# Supplementary material for: Systolic algorithms for imaging from space. Final report, 1 August 1986-31 July 1989
Source: Royal Society of Chemistry journal article supplement (doi:10.1039/c3an01194a), 1989-07-31
Supplement: c3an01194a.pdf [file c3an01194a.pdf]

## Supporting Information

Table S1.  $\zeta$  potential measurement of AuNPs solution in different conditions \*

| Number                    | a      | b      | c     |
|---------------------------|--------|--------|-------|
| $\zeta$ potential<br>(mV) | -24.28 | -12.07 | -9.65 |

\* (a) triazolylcoumarin-AuNPs solution; (b) triazolylcoumarin-AuNPs solution with the addition of lysozyme of 1.0  $\mu\text{g}/\text{mL}$  and 5.0  $\mu\text{g}/\text{mL}$  (c).

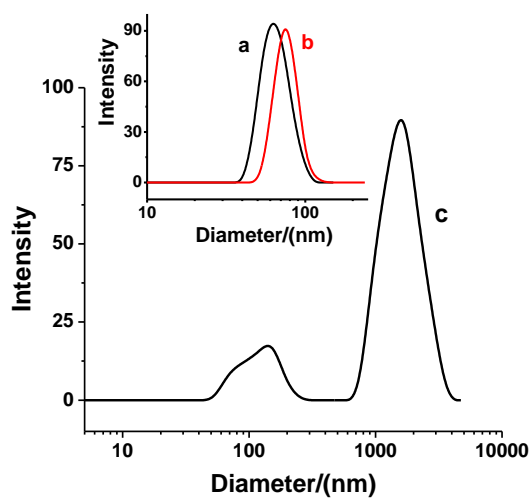

Figure S1. DLS measurements of AuNPs solution in different conditions: (a) AuNPs solution with the addition of PVP (0.25 mM); (b) triazolylcoumarin-AuNPs solution with the addition of PVP; (c) triazolylcoumarin-AuNPs solution with the addition of lysozyme (1.0  $\mu\text{g}/\text{mL}$ ). The concentration of triazolylcoumarin was 10  $\mu\text{M}$ .

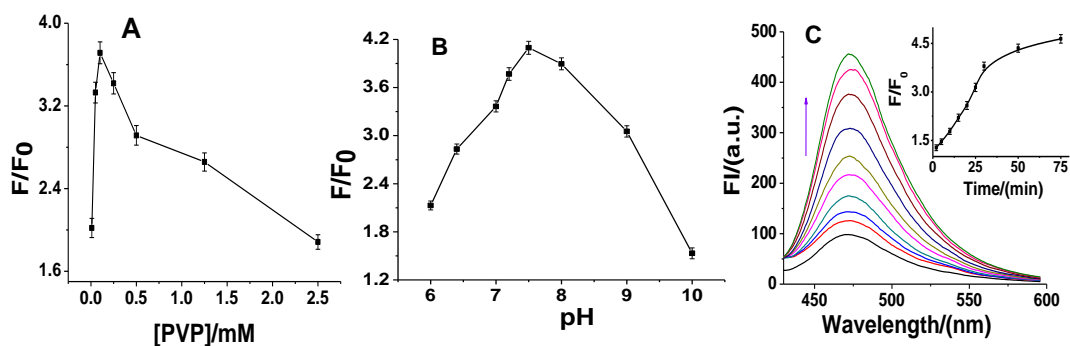

Figure S2. (A) Impact of concentrations of PVP on the fluorescence increase factor ( $F/F_0$ ). (B) Impact of pH value of the buffer solution on the fluorescence increase factor. (C) Time dependence of the fluorescence intensity after addition of lysozyme ( $1.0 \mu\text{g/mL}$ ) to triazolylcoumarin-AuNPs solution; Inset: Time dependence of the fluorescence increase factor.  $F$  and  $F_0$  were the fluorescence of triazolylcoumarin-AuNPs solution in the presence and absence of lysozyme, respectively.
